# Supplementary material
Source: PubMed Central journal article supplement (PMC10591919)
Supplement: NIHMS1932571-supplement-Supplementary_material.pdf [file NIHMS1932571-supplement-Supplementary_material.pdf]

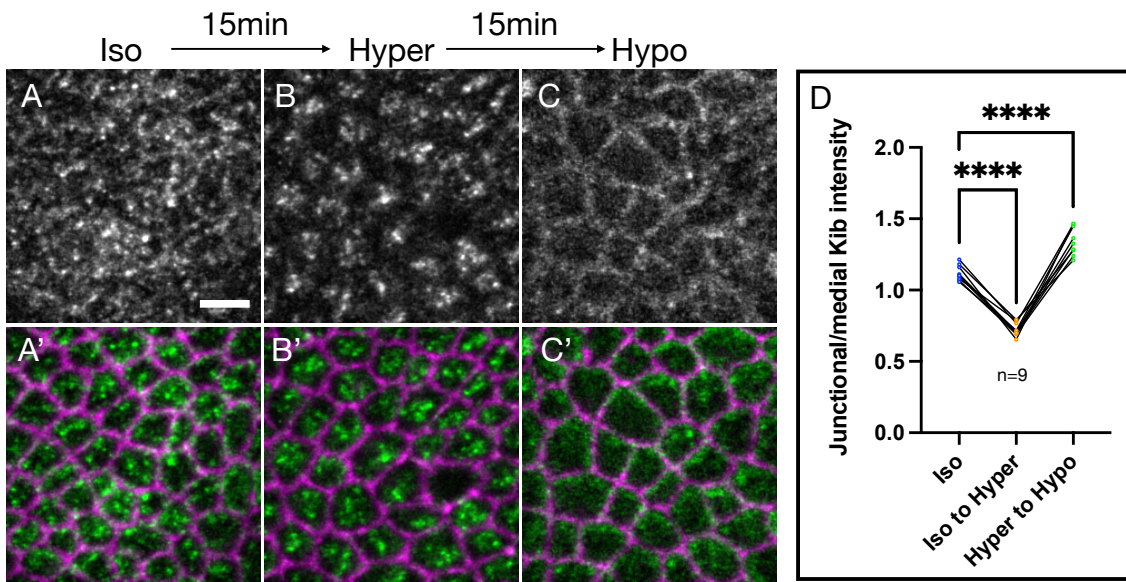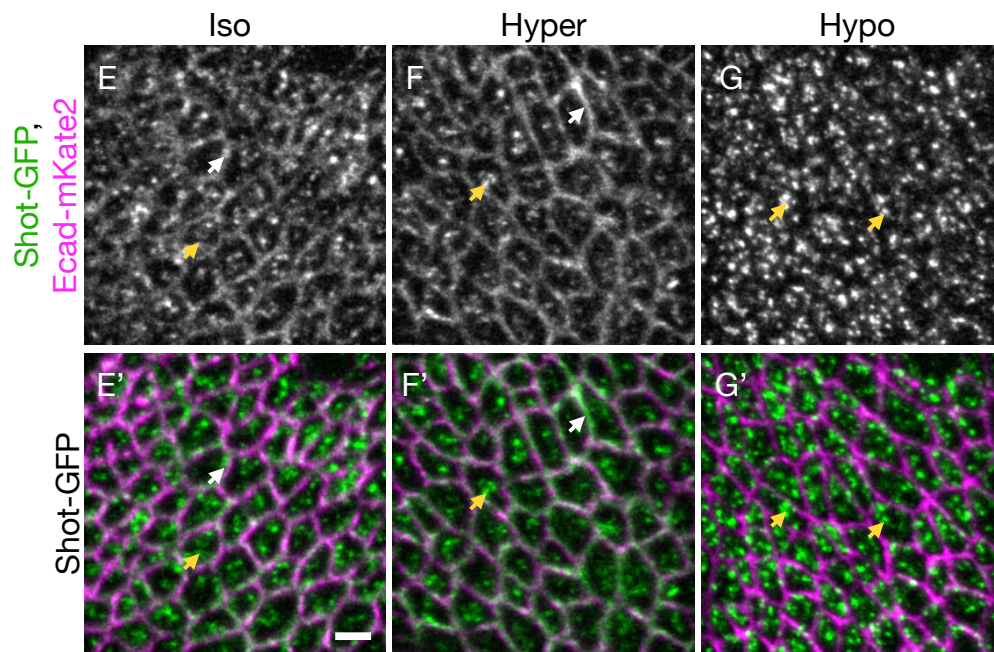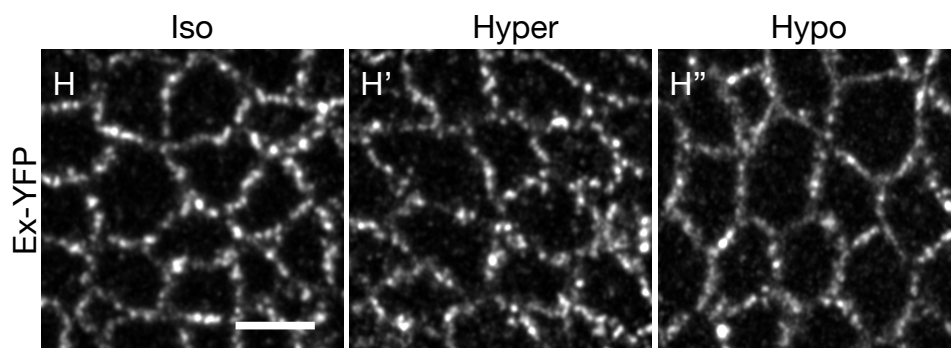

**Figure S1, related to Figure 2.**

**The effect of osmotic shifts on Kib localization is specific.**

(A-C) The effects of osmotic shifts are reversible. Shifting a wing imaginal tissue from isotonic (A and A') to hypertonic (B and B') solution leads to medial Kib accumulation. Shifting the same tissue from hypertonic to hypotonic (C and C') conditions results in redistribution of Kib from the medial to the junctional cortex.

(D) Quantification of junctional/medial Kib distribution in tissues sequentially subjected to isotonic to hypertonic followed by hypertonic to hypotonic shifts. Statistical significance was calculated using Repeated Measures one-way ANOVA test; n = number of wing discs.

(E-G') Similar to Kib, Shot localizes at the junctional (white arrow) and medial cortex (yellow arrowhead) under isotonic conditions (A and A'). However, Shot remains both junctional and medial under hypertonic conditions (B and B') and becomes predominantly medial under hypotonic conditions (C and C').

(H-H') Unlike Kib, Ex remains mostly junctional under osmotic shifts. Scale bars = 3 $\mu$ m.

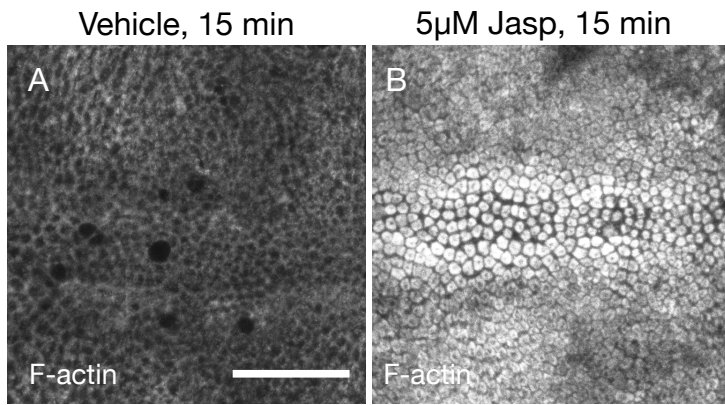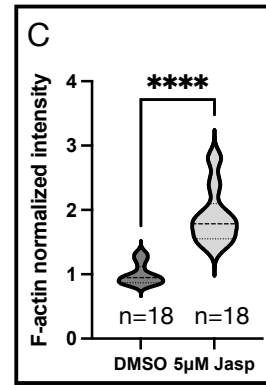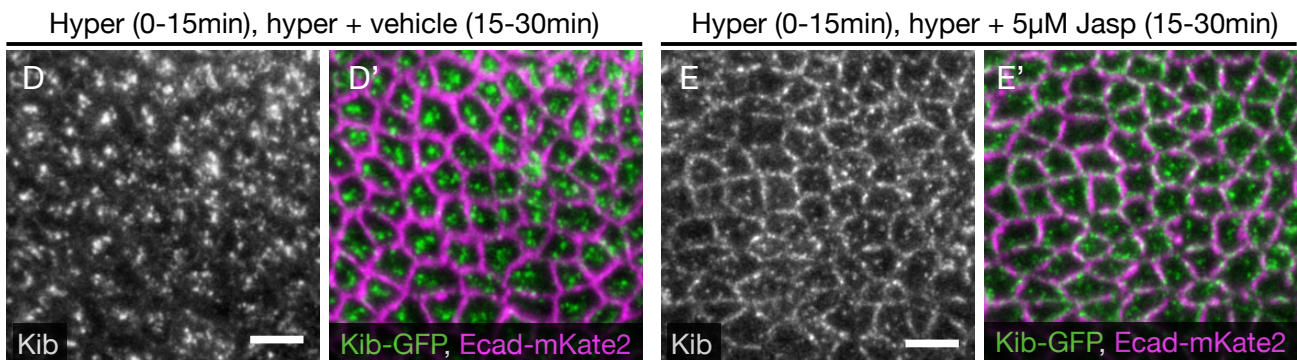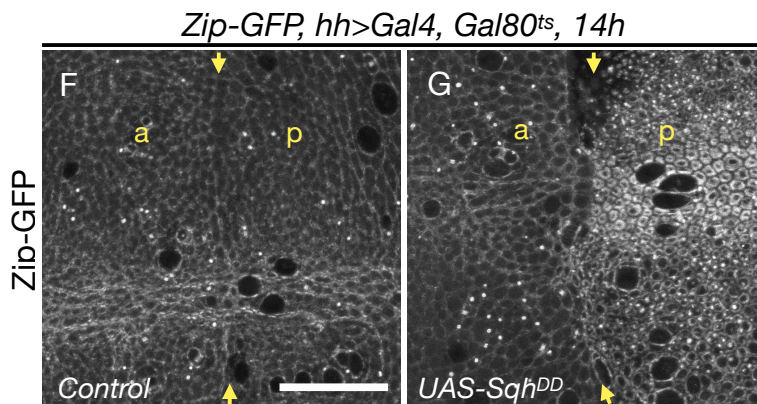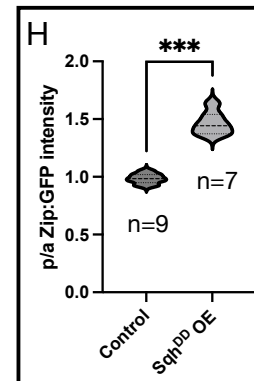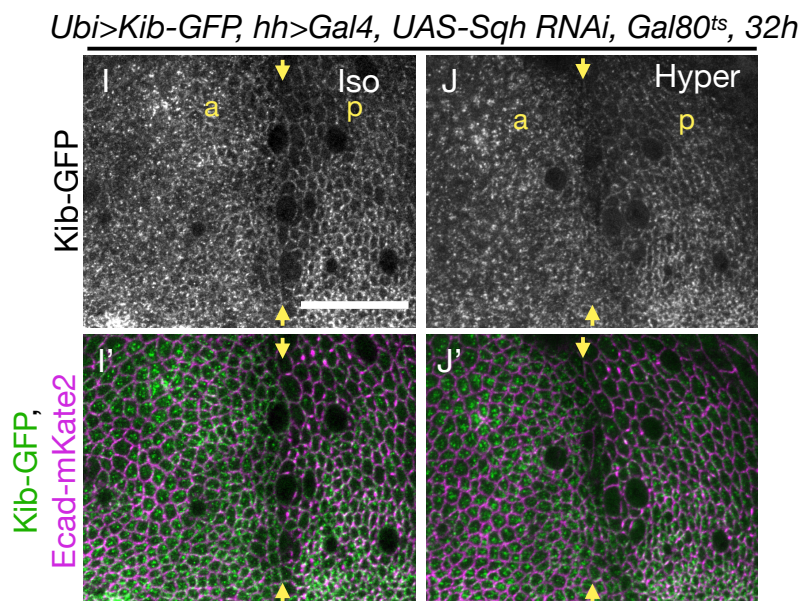

**Figure S2, related to Figure 3.**

**Medial Kib accumulation is mediated via actomyosin dynamics.**

(A and B) Compared to control tissues (A), F-actin (sGMCA) was more stabilized in tissues treated with 5 $\mu$ M Jasp (B). Scale bar = 20 $\mu$ m.

(C) Quantification of mean sGMCA intensity in tissues treated with DMSO or 5 $\mu$ M Jasp. Statistical significance was calculated using Mann-Whitney test; n = number of wing discs.

(D-E') F-actin dynamics are required to maintain Kib at the medial cortex. Tissues were first incubated under plain hypertonic conditions for 15 min to concentrate Kib medially, and then transferred to a hypertonic medium with DMSO (D and D') or 5 $\mu$ M Jasp (E and E'). Treatment with 5 $\mu$ M Jasp reverses medial Kib accumulation (E and E'). Scale bar = 5 $\mu$ m.

(F-G) Compared to control tissues (F), transient ectopic expression of Sqh<sup>DD</sup> in the posterior compartment of the wing disc results in significant stabilization of the myosin heavy chain, Zip-GFP (G). Yellow arrows indicate the anterior-posterior (a-p) boundary. Scale bar = 20 $\mu$ m.

(H) Quantification of the posterior/anterior (p/a) mean Zip:GFP intensity in control tissues and tissues transiently expressing Sqh<sup>DD</sup> in the posterior compartment. Statistical significance was calculated using Mann-Whitney test; n = number of wing discs.

(I-J') Transient depletion of Sqh in the posterior compartment of the wing imaginal disc leads to more junctional Kib (I and I') and prevents medial Kib accumulation under hypertonic conditions (J and J'). Scale bar = 20 $\mu$ m.

*Ubi>Kib-GFP, Ecad-mKate2, hh>Gal4, UAS-Crb RNAi*

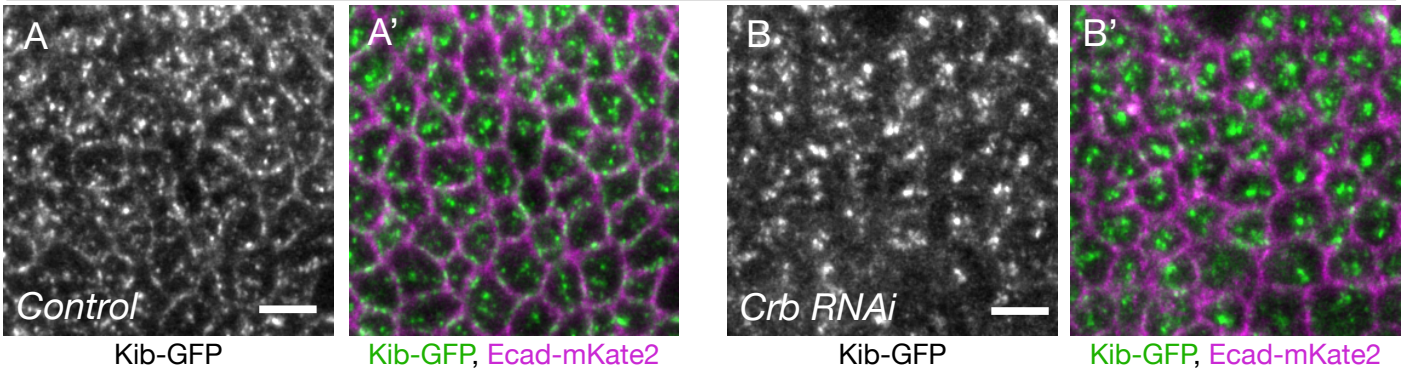

*crb<sup>1</sup> clone (RFP-)*

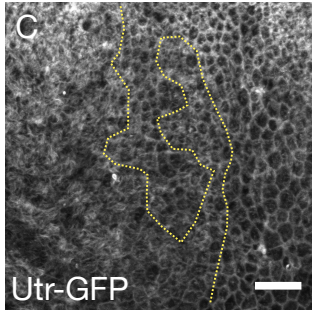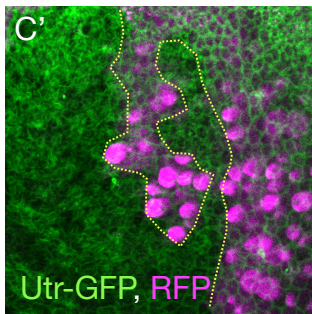

*hh>Gal4, UAS-Crb RNAi*

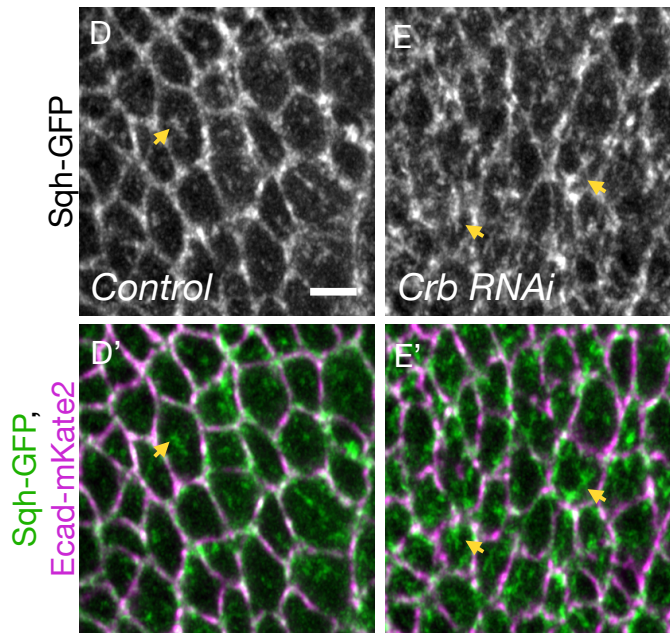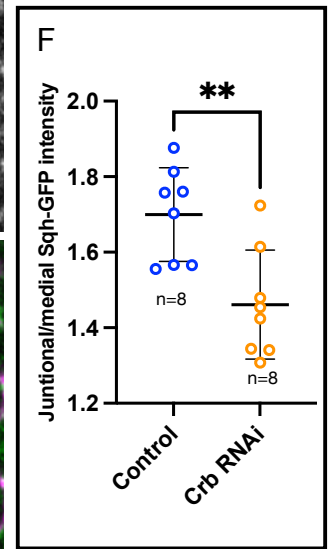

*hh>Gal4, UAS-Crb RNAi*

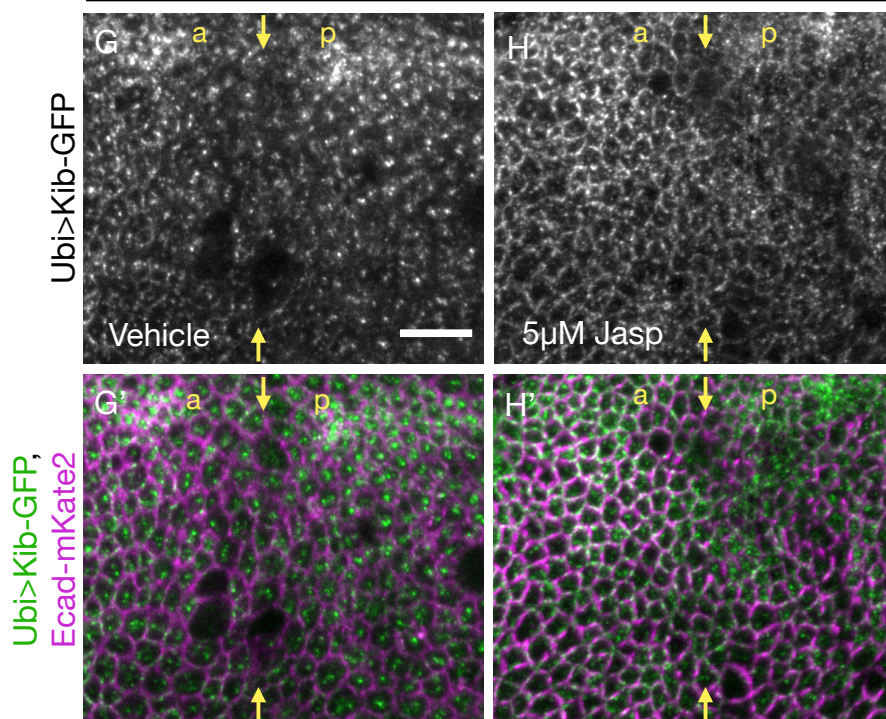

**Figure S3, related to Figure 3 and Figure 5.**

**Crb regulates Kib localization via actomyosin dynamics and junctional tethering.**

(A-B') Kib is junctional and medial in control cells (A and A') but is more medial in cells depleted of Crb (B and B'). Scale bar = 5 $\mu$ m.

(C and C') Apical F-actin organization is more medial in *crb*<sup>l</sup> somatic mosaic clones. Scale Bar = 10 $\mu$ m.

(D-E') Compared to control cells (D and D'), cells depleted of Crb (E and E') display disrupted junctional myosin organization and more pronounced medial myosin accumulation (arrowheads). Scale Bar = 3 $\mu$ m.

(F) Quantification of junctional/medial myosin distribution in control vs. Crb-depleted cells.

Statistical significance was calculated using the Mann-Whitney test; n = number of wing discs.

(G-H') Although Kib accumulates medially upon depletion of Crb in the posterior (p) compartment of the wing imaginal disc (G and G'), this accumulation is blocked by Jasp treatment (H and H'). Note that while Jasp treatment enhances junctional Kib localization in the anterior (a) compartment, it fails to restore junctional Kib in the posterior, where Crb is depleted (H and H'). Scale Bar = 10 $\mu$ m.

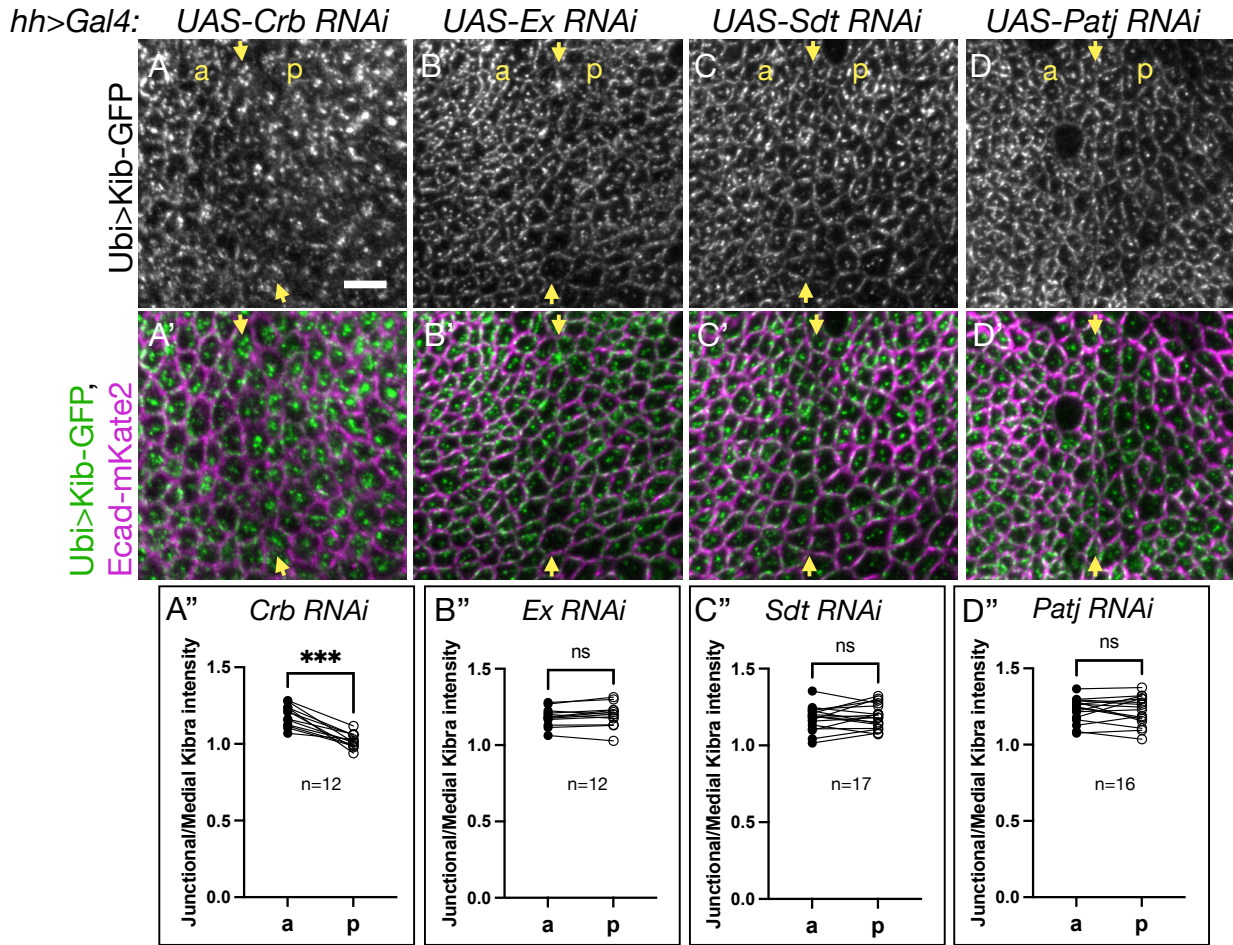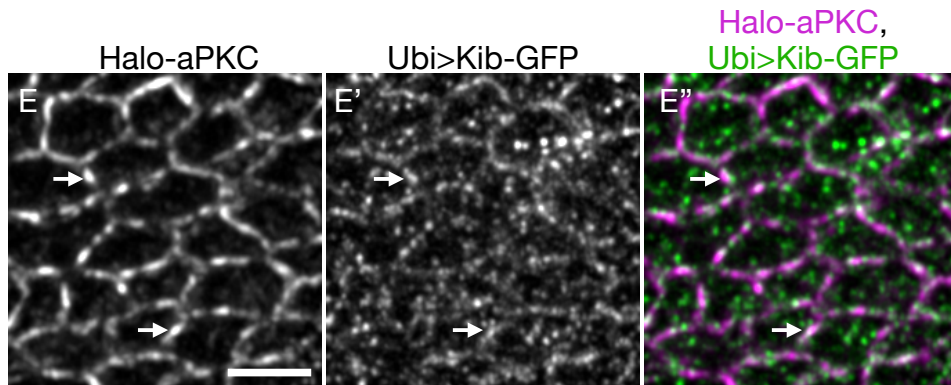

*hh>Gal4, UAS-Crb RNAi*

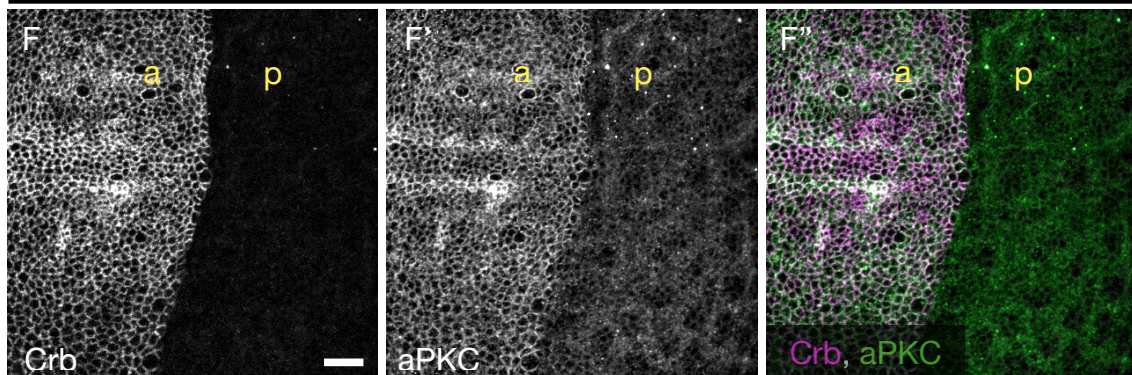

**Figure S4, related to Figure 5 and Figure 6.**

**Crb does not control Kib localization via Ex, Sdt, or Patj.**

A-D'') While loss of Crb results in more medial Kib (A-A''), loss of Ex (B-B''), Sdt (C-C''), or Patj (D-D'') has no significant effect on Kib localization. Yellow arrowheads indicate the anterior-posterior (a-p) boundary. Scale bar = 5 $\mu$ m.

Statistical significance was calculated using Wilcoxon matched-pairs signed rank test; n = number of wing discs.

E-E'') An apical projection of the wing imaginal disc cells showing that aPKC is highly enriched at the junctional cortex and that some junctional aPKC foci co-localize with Kib (white arrows). Scale bar = 3 $\mu$ m.

F-F'') Crb depletion in the posterior (p) compartment of the wing imaginal disc leads to significant decrease in cortical aPKC. Scale bar = 10 $\mu$ m.



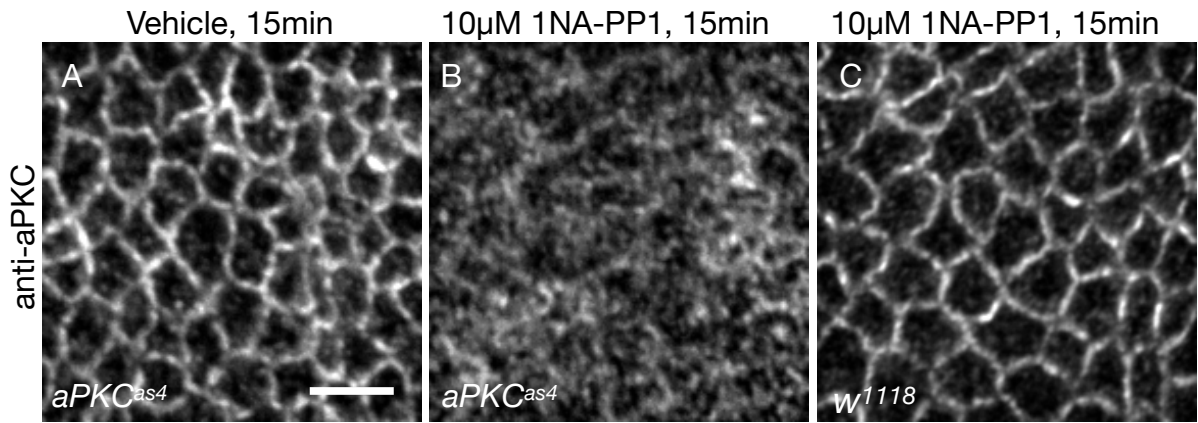

*Ubi>Kib-GFP* (wild-type *aPKC* background)

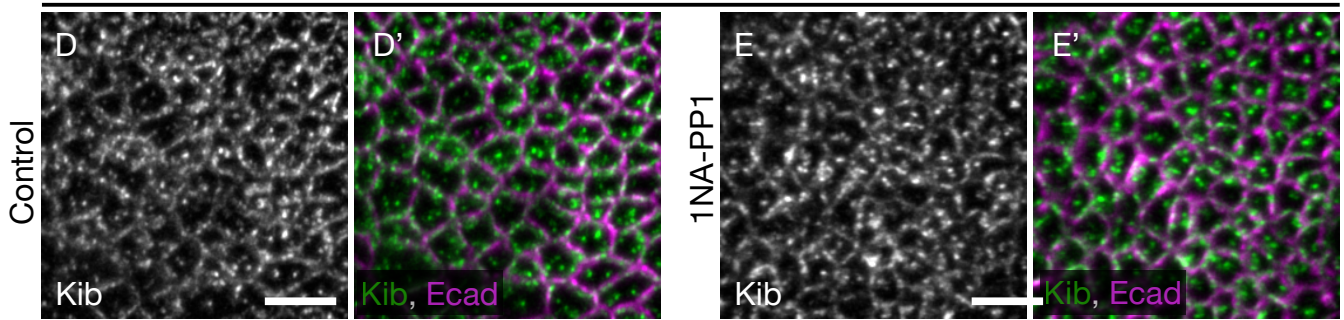

F *Nub>Gal4*

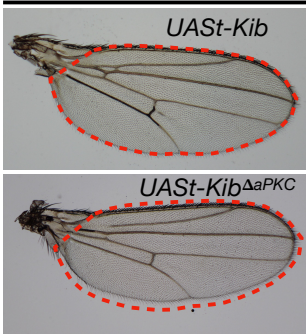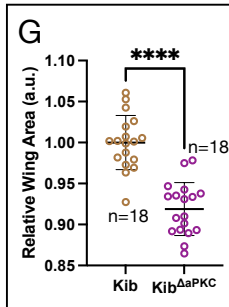

*Nub>Gal4*

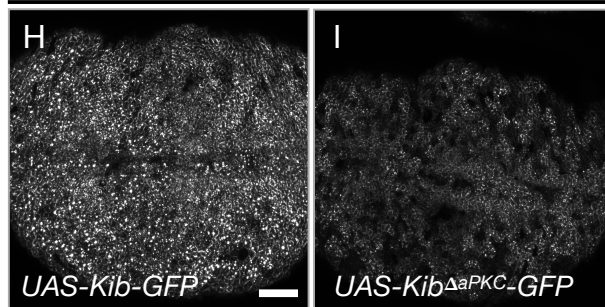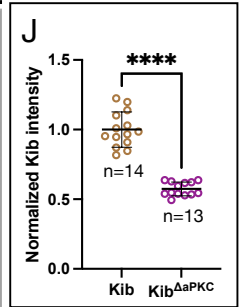

*Nub>Gal4*

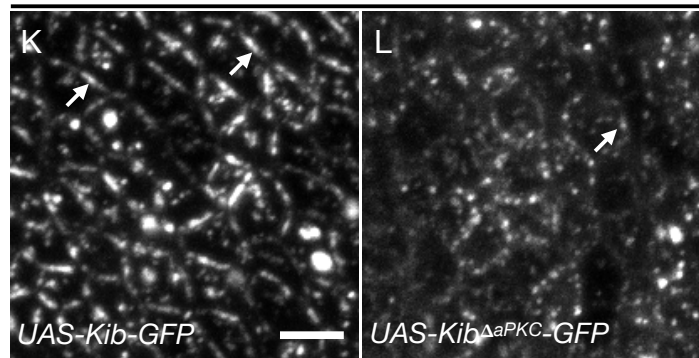

**Figure S5, related to Figure 7.**

**aPKC-mediated regulation of Kib in vivo.**

(A-C) Validation of the specificity of aPKC<sup>as4</sup> inhibition by 1NA-PP1 in the wing imaginal disc. In tissues homozygous for *aPKCas4* allele, aPKC displays normal cortical localization (A). Treatment with 1NA-PP1 severely disrupts aPKC cortical localization (B). In contrast, wild-type aPKC is not affected by 1NA-PP1 treatment (C). Scale bar = 5μm.

(D-E') Treatment with 1NA-PP1 does not affect Kib localization in the wild-type *aPKC* background. Scale bars = 5μm.

(F and G) Ectopic expression of Kib<sup>ΔaPKC</sup> (*UAS>Kib<sup>ΔaPKC</sup>-GFP*) using a wing-specific driver (*Nub>Gal4*) leads to slightly smaller wings compared to the expression of wild-type Kib (*UAS>Kib-GFP*); n = number of wings.

(H-J) Wild-type Kib (H) ectopically expressed specifically in the wing pouch is more stable than Kib<sup>ΔaPKC</sup> (I and J); n = number of wing discs. Scale bar = 20μm. Transgenes in F-I are identically expressed.

Statistical significance in (G) and (J) was calculated using Mann-Whitney test.

(K-L) Similar to wild type Kib-GFP, ectopically expressed Kib<sup>ΔaPKC</sup>-GFP still localizes at the junctional cortex, albeit less prominently. Note that brightness in L was enhanced relative to K. Scale bar = 3μm.

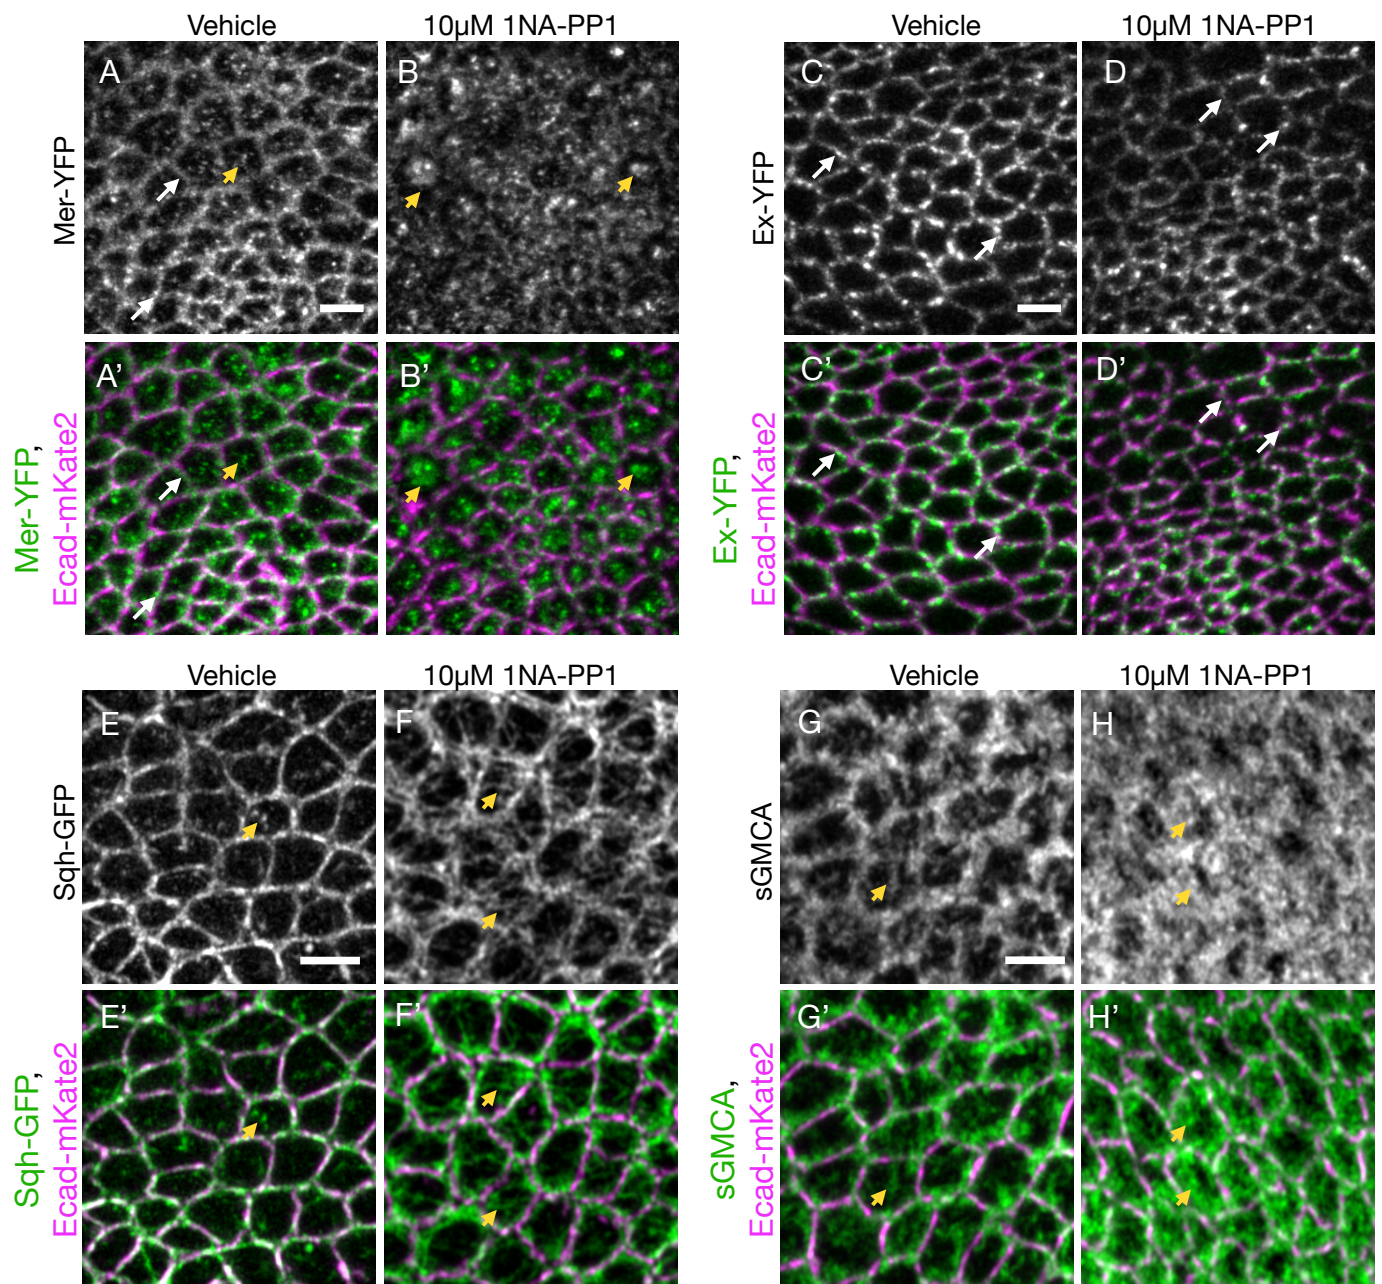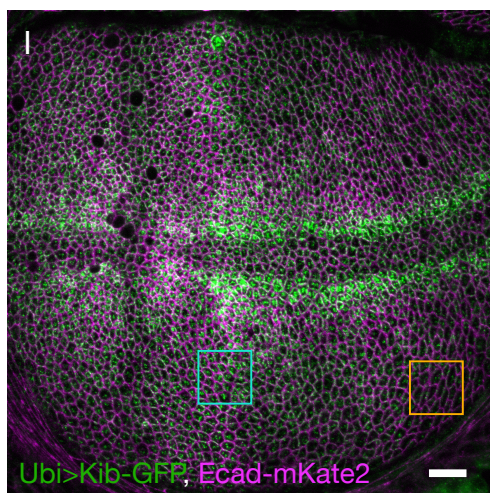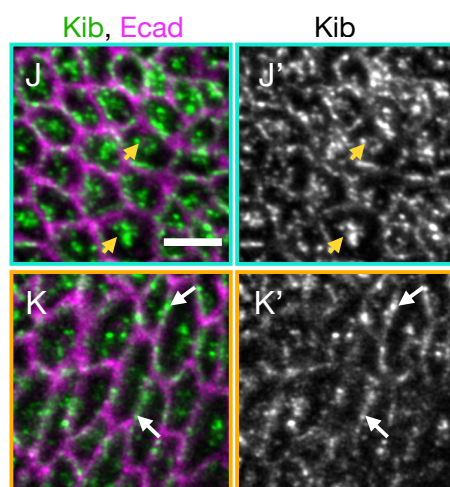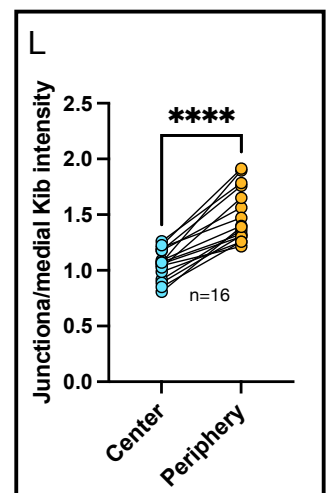

**Figure S6, related to Figure 7.**

**The effect of acute aPKC inhibition on Hippo pathway components and actomyosin organization.**

(A-B') Compared to control conditions (A and A') where Mer displays junctional and medial localization, Mer becomes more medial under aPKC inhibition with 1NA-PP1 (B and B').

(C-D') Unlike Kib and Mer, Ex remains junctional under aPKC inhibition with 1NA-PP1.

(E-H') aPKC inhibition with 1NA-PP1 results in more medial myosin (E-F') and F-actin (G-H') organization. Wing imaginal tissues in A-H' are homozygous for *aPKCas4* allele. Scale bars = 3 $\mu$ m.

(I) A low magnification view of a wing imaginal tissue expressing Ubi>Kib-GFP and Ecad-mKate2. The boxes indicate the regions at the center (cyan) and the periphery (orange) of the tissue that are enlarged in (J-K'). Scale bar = 10 $\mu$ m.

(J-K') Enlarged views of cells at the center (J and J') and periphery (K and K') of the tissue shown in (I). Scale bar = 3 $\mu$ m. Yellow arrowheads point to the medial cortex; white arrows point to the junctional cortex.

(L) Quantification of mean junctional/medial Kib intensity in cells at the center vs. periphery of the wing imaginal epithelium. Statistical significance was calculated using Wilcoxon matched-pairs signed rank test; n = number of wing discs.
